# Supplementary material for: RNA-Seq analysis implicates dysregulation of the immune system in schizophrenia
Source: PubMed Central journal article supplement (PMC3535722; doi:10.1186/1471-2164-13-s8-s2), 2012-12-17
Supplement: 1471-2164-13-S8-S2-S1.pdf [file 1471-2164-13-S8-S2-S1.pdf]

## Additional file

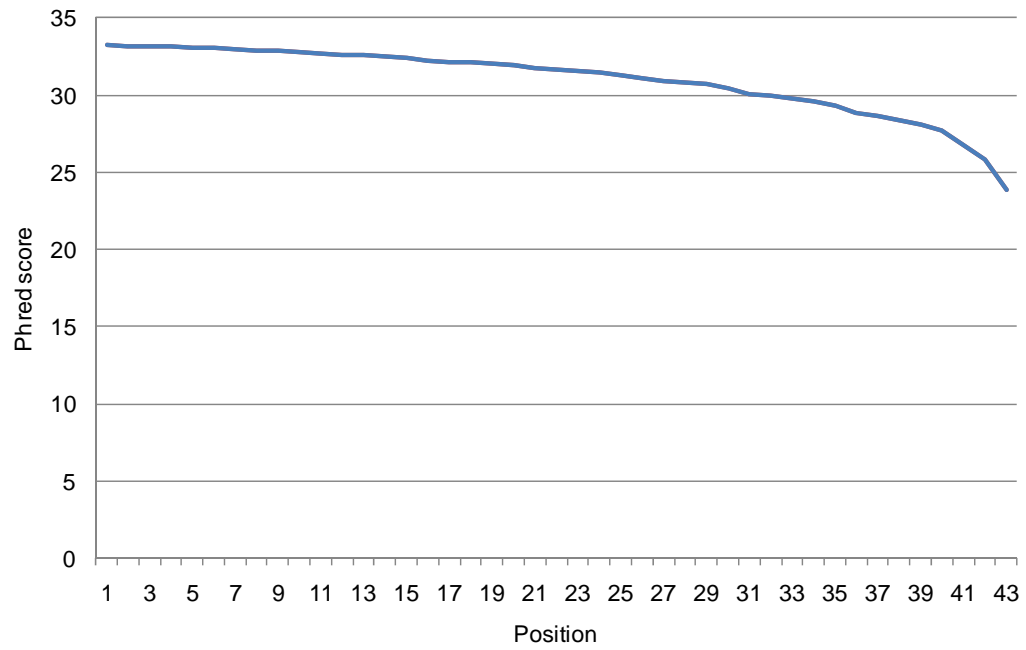

**Figure S1. Median Phred score vs. base position (cycle)**

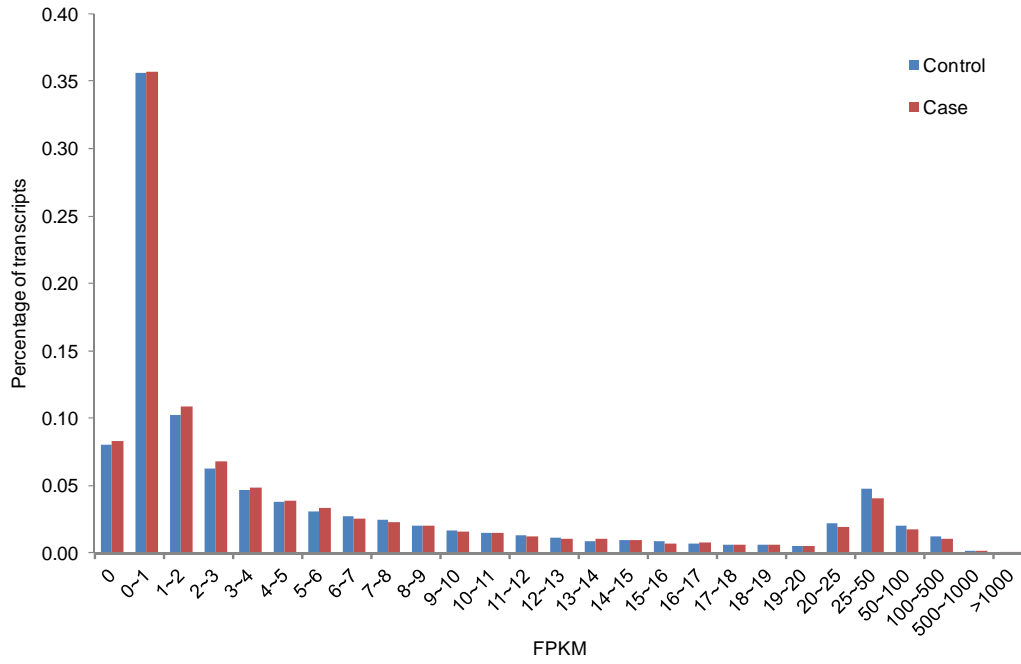

**Figure S2. Distribution of the average FPKM values in the controls and cases. FPKM represents for fragments per kilobase of exon per million fragments mapped.**

**Table S1 - Differentially expressed genes between schizophrenia patients and controls**

| Transcript ID | Sum of control FPKM | Sum of case FPKM | P-value <sup>a</sup> | Bonferroni adjusted P-value | Gene symbol      | Gene description                                                                    |
|---------------|---------------------|------------------|----------------------|-----------------------------|------------------|-------------------------------------------------------------------------------------|
| NM_000517     | 686.9               | 7778.5           | 0                    | 0                           | <i>HBA2</i>      | hemoglobin, alpha 2                                                                 |
| NM_000518     | 835.4               | 11907.3          | 0                    | 0                           | <i>HBB</i>       | hemoglobin, beta                                                                    |
| NM_000558     | 2304.3              | 15941.9          | 0                    | 0                           | <i>HBA1</i>      | hemoglobin, alpha 1                                                                 |
| NM_006026     | 736.7               | 2742.9           | 5.53E-282            | 2.61E-278                   | <i>H1FX</i>      | H1 histone family, member X                                                         |
| NM_005324     | 865.3               | 2765.4           | 3.94E-241            | 1.86E-237                   | <i>H3F3B</i>     | H3 histone, family 3B (H3.3B)                                                       |
| NM_002228     | 213.0               | 1364.9           | 6.79E-213            | 3.20E-209                   | <i>JUN</i>       | jun proto-oncogene                                                                  |
| NM_005347     | 226.8               | 1346.8           | 1.06E-200            | 4.99E-197                   | <i>HSPA5</i>     | heat shock 70kDa protein 5 (glucose-regulated protein, 78kDa)                       |
| NM_002778     | 4150.0              | 1985.0           | 1.70E-160            | 8.04E-157                   | <i>PSAP</i>      | prosaposin                                                                          |
| NM_000584     | 133.9               | 766.9            | 1.70E-112            | 8.01E-109                   | <i>IL8</i>       | interleukin 8                                                                       |
| NM_002003     | 3575.5              | 2014.0           | 5.37E-90             | 2.53E-86                    | <i>FCN1</i>      | ficolin (collagen/fibrinogen domain containing)                                     |
| NM_000239     | 7055.1              | 4773.2           | 1.09E-86             | 5.12E-83                    | <i>LYZ</i>       | lysozyme                                                                            |
| NM_005354     | 1546.4              | 2659.1           | 9.12E-74             | 4.30E-70                    | <i>JUND</i>      | jun D proto-oncogene                                                                |
| NM_006472     | 3016.0              | 1760.5           | 6.30E-68             | 2.97E-64                    | <i>TXNIP</i>     | thioredoxin interacting protein                                                     |
| NM_014330     | 377.1               | 979.3            | 8.15E-66             | 3.84E-62                    | <i>PPP1R15A</i>  | protein phosphatase 1, regulatory (inhibitor) subunit 15A                           |
| NM_004083     | 110.9               | 472.4            | 2.37E-56             | 1.12E-52                    | <i>DDIT3</i>     | DNA-damage-inducible transcript 3                                                   |
| NM_003407     | 497.7               | 1100.6           | 2.41E-56             | 1.13E-52                    | <i>ZFP36</i>     | zinc finger protein 36, C3H type, homolog (mouse)                                   |
| NM_006732     | 52.9                | 339.2            | 4.10E-54             | 1.93E-50                    | <i>FOSB</i>      | FBJ murine osteosarcoma viral oncogene homolog B                                    |
| NM_005319     | 31.9                | 285.2            | 1.15E-53             | 5.43E-50                    | <i>HIST1H1C</i>  | histone cluster 1, H1c                                                              |
| NM_002970     | 892.9               | 1569.5           | 3.82E-47             | 1.80E-43                    | <i>SAT1</i>      | spermidine/spermine N1-acetyltransferase 1                                          |
| NM_004040     | 82.9                | 365.7            | 2.08E-45             | 9.82E-42                    | <i>RHOB</i>      | ras homolog gene family, member B                                                   |
| NM_020529     | 828.7               | 1458.3           | 5.88E-44             | 2.77E-40                    | <i>NFKBIA</i>    | nuclear factor of kappa light polypeptide gene enhancer in B-cells inhibitor, alpha |
| NM_002229     | 1652.8              | 2483.7           | 1.02E-43             | 4.80E-40                    | <i>JUNB</i>      | jun B proto-oncogene                                                                |
| NM_001160125  | 90.2                | 347.1            | 1.83E-38             | 8.62E-35                    | <i>KLF6</i>      | Kruppel-like factor 6                                                               |
| NM_004417     | 576.0               | 1066.8           | 2.30E-37             | 1.08E-33                    | <i>DUSP1</i>     | dual specificity phosphatase 1                                                      |
| NM_004907     | 338.2               | 731.9            | 1.24E-36             | 5.84E-33                    | <i>IER2</i>      | immediate early response 2                                                          |
| NM_001013699  | 151.6               | 439.5            | 2.04E-35             | 9.60E-32                    | <i>H3F3C</i>     | H3 histone, family 3C                                                               |
| NM_021149     | 1796.4              | 1106.7           | 3.39E-34             | 1.60E-30                    | <i>COTL1</i>     | coactosin-like 1 (Dictyostelium)                                                    |
| NM_019111     | 2931.9              | 2028.0           | 3.10E-33             | 1.46E-29                    | <i>HLA-DRA</i>   | major histocompatibility complex, class II, DR alpha                                |
| NM_015675     | 253.1               | 581.4            | 1.01E-32             | 4.74E-29                    | <i>GADD45B</i>   | growth arrest and DNA-damage-inducible, beta                                        |
| NM_002985     | 285.0               | 621.0            | 1.03E-31             | 4.88E-28                    | <i>CCL5</i>      | chemokine (C-C motif) ligand 5                                                      |
| NM_003517     | 59.6                | 242.6            | 1.22E-28             | 5.73E-25                    | <i>HIST2H2AC</i> | histone cluster 2, H2ac                                                             |
| NM_002087     | 594.1               | 266.3            | 5.00E-28             | 2.36E-24                    | <i>GRN</i>       | granulin                                                                            |
| NM_004079     | 858.6               | 449.8            | 5.58E-28             | 2.63E-24                    | <i>CTSS</i>      | cathepsin S                                                                         |

|              |        |        |          |          |                 |                                                                             |
|--------------|--------|--------|----------|----------|-----------------|-----------------------------------------------------------------------------|
| NM_002964    | 4275.3 | 5181.1 | 1.02E-26 | 4.82E-23 | <i>S100A8</i>   | S100 calcium binding protein A8                                             |
| NM_001300    | 235.3  | 502.5  | 3.62E-25 | 1.71E-21 | <i>KLF6</i>     | Kruppel-like factor 6                                                       |
| NM_001066    | 636.5  | 313.0  | 1.16E-24 | 5.45E-21 | <i>TNFRSF1B</i> | tumor necrosis factor receptor superfamily, member 1B                       |
| NM_001174105 | 363.8  | 134.9  | 2.49E-24 | 1.18E-20 | <i>CD14</i>     | CD14 molecule                                                               |
| NM_021009    | 1236.6 | 1737.7 | 1.74E-23 | 8.19E-20 | <i>UBC</i>      | ubiquitin C                                                                 |
| NM_001908    | 354.5  | 135.5  | 6.57E-23 | 3.10E-19 | <i>CTSB</i>     | cathepsin B                                                                 |
| NM_000211    | 971.5  | 570.8  | 1.11E-22 | 5.22E-19 | <i>ITGB2</i>    | integrin, beta 2 (complement component 3 receptor 3 and 4 subunit)          |
| NM_033423    | 50.1   | 193.3  | 3.84E-22 | 1.81E-18 | <i>GZMH</i>     | granzyme H (cathepsin G-like 2, protein h-CCPX)                             |
| NM_005318    | 70.4   | 229.0  | 4.16E-22 | 1.96E-18 | <i>H1F0</i>     | H1 histone family, member 0                                                 |
| NM_001145252 | 544.7  | 263.7  | 4.97E-22 | 2.34E-18 | <i>CFP</i>      | complement factor properdin                                                 |
| NM_001909    | 867.0  | 496.7  | 5.14E-22 | 2.42E-18 | <i>CTSD</i>     | cathepsin D                                                                 |
| NM_001064    | 674.6  | 356.4  | 5.46E-22 | 2.57E-18 | <i>TKT</i>      | transketolase                                                               |
| NM_004355    | 2898.5 | 2175.4 | 1.30E-20 | 6.13E-17 | <i>CD74</i>     | CD74 molecule, major histocompatibility complex, class II invariant chain   |
| NM_006332    | 1750.4 | 1209.5 | 1.36E-20 | 6.42E-17 | <i>IFI30</i>    | interferon, gamma-inducible protein 30                                      |
| NM_006433    | 404.9  | 690.7  | 4.68E-20 | 2.21E-16 | <i>GNLY</i>     | granulysin                                                                  |
| NR_028272    | 572.1  | 888.5  | 7.94E-19 | 3.74E-15 | <i>NEAT1</i>    | nuclear paraspeckle assembly transcript 1 (non-protein coding)              |
| NM_006176    | 414.1  | 195.0  | 3.60E-18 | 1.70E-14 | <i>NRGN</i>     | neurogranin (protein kinase C substrate, RC3)                               |
| NM_022153    | 447.5  | 218.1  | 4.12E-18 | 1.94E-14 | <i>C10ORF54</i> | chromosome 10 open reading frame 54                                         |
| NR_002819    | 740.7  | 1079.7 | 8.63E-18 | 4.07E-14 | <i>MALAT1</i>   | metastasis associated lung adenocarcinoma transcript 1 (non-protein coding) |
| NM_001743    | 278.6  | 109.1  | 1.23E-17 | 5.82E-14 | <i>CALM2</i>    | calmodulin 2 (phosphorylase kinase, delta)                                  |
| NM_001127491 | 712.9  | 416.0  | 1.83E-17 | 8.62E-14 | <i>ITGB2</i>    | integrin, beta 2 (complement component 3 receptor 3 and 4 subunit)          |
| NM_006887    | 548.8  | 297.1  | 4.55E-17 | 2.15E-13 | <i>ZFP36L2</i>  | zinc finger protein 36, C3H type-like 2                                     |
| NM_000099    | 1624.5 | 1150.7 | 4.60E-17 | 2.17E-13 | <i>CST3</i>     | cystatin C                                                                  |
| NM_004049    | 131.3  | 295.5  | 6.81E-17 | 3.21E-13 | <i>BCL2A1</i>   | BCL2-related protein A1                                                     |
| NM_021127    | 36.8   | 142.0  | 1.28E-16 | 6.05E-13 | <i>PMAIP1</i>   | phorbol-12-myristate-13-acetate-induced protein 1                           |
| NM_001015881 | 599.8  | 897.1  | 1.32E-16 | 6.21E-13 | <i>TSC22D3</i>  | TSC22 domain family, member 3                                               |
| NM_001105556 | 327.1  | 145.0  | 1.73E-16 | 8.16E-13 | <i>C10RF38</i>  | chromosome 1 open reading frame 38                                          |
| NM_031311    | 341.6  | 157.2  | 4.35E-16 | 2.05E-12 | <i>CPVL</i>     | carboxypeptidase, vitellogenic-like                                         |
| NM_005248    | 294.5  | 125.5  | 4.65E-16 | 2.19E-12 | <i>FGR</i>      | Gardner-Rasheed feline sarcoma viral (v-fgr) oncogene homolog               |
| NM_020307    | 408.7  | 657.1  | 4.82E-16 | 2.27E-12 | <i>CCNL1</i>    | cyclin L1                                                                   |
| NM_000989    | 6505.1 | 5474.3 | 5.69E-16 | 2.68E-12 | <i>RPL30</i>    | ribosomal protein L30                                                       |
| NM_004233    | 73.7   | 201.6  | 5.99E-16 | 2.82E-12 | <i>CD83</i>     | CD83 molecule                                                               |
| NM_000442    | 267.1  | 109.2  | 7.96E-16 | 3.75E-12 | <i>PECAM1</i>   | platelet/endothelial cell adhesion molecule                                 |
| NM_001164097 | 309.4  | 136.9  | 1.13E-15 | 5.31E-12 | <i>VCAN</i>     | versican                                                                    |

|              |        |        |          |          |                 |                                                                                     |
|--------------|--------|--------|----------|----------|-----------------|-------------------------------------------------------------------------------------|
| NM_001961    | 3332.4 | 2644.0 | 1.44E-15 | 6.77E-12 | <i>EEF2</i>     | eukaryotic translation elongation factor 2                                          |
| NM_001126105 | 231.6  | 90.1   | 4.29E-15 | 2.02E-11 | <i>SLC7A7</i>   | solute carrier family 7 (cationic amino acid transporter, y+ system), member 7      |
| NM_006762    | 1788.6 | 1317.4 | 4.86E-15 | 2.29E-11 | <i>LAPTM5</i>   | lysosomal protein transmembrane 5                                                   |
| NM_019058    | 555.9  | 321.2  | 1.97E-14 | 9.27E-11 | <i>DDIT4</i>    | DNA-damage-inducible transcript 4                                                   |
| NM_004343    | 523.4  | 776.0  | 3.40E-14 | 1.60E-10 | <i>CALR</i>     | calreticulin                                                                        |
| NM_177924    | 308.4  | 146.4  | 9.14E-14 | 4.31E-10 | <i>ASAH1</i>    | N-acylsphingosine amidohydrolase (acid ceramidase) 1                                |
| NM_031419    | 149.9  | 298.9  | 1.17E-13 | 5.53E-10 | <i>NFKBIZ</i>   | nuclear factor of kappa light polypeptide gene enhancer in B-cells inhibitor, zeta  |
| NM_001039396 | 324.0  | 158.3  | 1.38E-13 | 6.51E-10 | <i>MPEG1</i>    | macrophage expressed 1                                                              |
| NM_016127    | 932.3  | 624.1  | 1.51E-13 | 7.11E-10 | <i>TMEM66</i>   | transmembrane protein 66                                                            |
| NM_005195    | 301.1  | 142.7  | 1.98E-13 | 9.33E-10 | <i>CEBPD</i>    | CCAAT/enhancer binding protein (C/EBP), delta                                       |
| NM_002339    | 980.0  | 665.1  | 2.30E-13 | 1.09E-09 | <i>LSP1</i>     | lymphocyte-specific protein 1                                                       |
| NM_001251    | 618.6  | 378.7  | 3.25E-13 | 1.53E-09 | <i>CD68</i>     | CD68 molecule                                                                       |
| NM_002569    | 238.4  | 101.6  | 3.42E-13 | 1.61E-09 | <i>FURIN</i>    | furin (paired basic amino acid cleaving enzyme)                                     |
| NM_005720    | 784.5  | 511.4  | 5.52E-13 | 2.60E-09 | <i>ARPC1B</i>   | actin related protein 2/3 complex, subunit 1B, 41kDa                                |
| NM_006498    | 343.7  | 176.1  | 6.67E-13 | 3.14E-09 | <i>LGALS2</i>   | lectin, galactoside-binding, soluble, 2                                             |
| NM_033027    | 193.3  | 350.7  | 6.92E-13 | 3.26E-09 | <i>CSRNP1</i>   | cysteine-serine-rich nuclear protein 1                                              |
| NM_001002235 | 181.7  | 67.7   | 7.66E-13 | 3.61E-09 | <i>SERPINA1</i> | serpin peptidase inhibitor, clade A (alpha-1 antiproteinase, antitrypsin), member 1 |
| NM_000999    | 1247.6 | 1587.5 | 8.03E-13 | 3.79E-09 | <i>RPL38</i>    | ribosomal protein L38                                                               |
| NM_000714    | 331.7  | 170.8  | 2.54E-12 | 1.20E-08 | <i>TSPO</i>     | translocator protein (18kDa)                                                        |
| NM_025195    | 23.0   | 94.3   | 4.29E-12 | 2.02E-08 | <i>TRIB1</i>    | tribbles homolog 1 (Drosophila)                                                     |
| NM_005346    | 74.9   | 177.6  | 9.69E-12 | 4.57E-08 | <i>HSPA1B</i>   | heat shock 70kDa protein 1B                                                         |
| NM_001173515 | 1879.2 | 1449.1 | 1.08E-11 | 5.07E-08 | <i>TYROBP</i>   | TYRO protein tyrosine kinase binding protein                                        |
| NM_005601    | 347.9  | 533.7  | 1.52E-11 | 7.16E-08 | <i>NKG7</i>     | natural killer cell group 7 sequence                                                |
| NM_015474    | 248.3  | 117.1  | 1.68E-11 | 7.92E-08 | <i>SAMHD1</i>   | SAM domain and HD domain 1                                                          |
| NM_000358    | 314.9  | 163.6  | 1.73E-11 | 8.17E-08 | <i>TGFBI</i>    | transforming growth factor, beta-induced, 68kDa                                     |
| NM_005594    | 318.8  | 166.8  | 1.82E-11 | 8.58E-08 | <i>NACA</i>     | nascent polypeptide-associated complex alpha subunit                                |
| NM_000528    | 326.1  | 172.7  | 2.57E-11 | 1.21E-07 | <i>MAN2B1</i>   | mannosidase, alpha, class 2B, member 1                                              |
| NM_006291    | 593.8  | 377.0  | 2.81E-11 | 1.33E-07 | <i>TNFAIP2</i>  | tumor necrosis factor, alpha-induced protein 2                                      |
| NM_004108    | 235.0  | 109.6  | 3.80E-11 | 1.79E-07 | <i>FCN2</i>     | ficolin (collagen/fibrinogen domain containing lectin) 2 (hucolin)                  |
| NM_024829    | 281.1  | 142.3  | 3.95E-11 | 1.86E-07 | <i>PLBD1</i>    | phospholipase B domain containing 1                                                 |
| NM_001013    | 3344.9 | 2757.5 | 4.22E-11 | 1.99E-07 | <i>RPS9</i>     | ribosomal protein S9                                                                |
| NM_004235    | 85.2   | 187.8  | 5.12E-11 | 2.41E-07 | <i>KLF4</i>     | Kruppel-like factor 4 (gut)                                                         |
| NM_006931    | 155.4  | 284.4  | 6.45E-11 | 3.04E-07 | <i>SLC2A3</i>   | solute carrier family 2 (facilitated glucose transporter), member 3                 |
| NM_001025159 | 798.7  | 546.4  | 7.17E-11 | 3.38E-07 | <i>CD74</i>     | CD74 molecule, major histocompatibility complex, class II invariant chain           |

|              |        |        |          |          |                   |                                                                                         |
|--------------|--------|--------|----------|----------|-------------------|-----------------------------------------------------------------------------------------|
| NM_001142277 | 205.6  | 91.6   | 7.64E-11 | 3.60E-07 | <i>APLP2</i>      | amyloid beta (A4) precursor-like protein 2                                              |
| NM_005627    | 46.3   | 127.0  | 9.58E-11 | 4.52E-07 | <i>SGK1</i>       | serum/glucocorticoid regulated kinase 1                                                 |
| NM_000895    | 324.5  | 175.7  | 1.22E-10 | 5.77E-07 | <i>LTA4H</i>      | leukotriene A4 hydrolase                                                                |
| NM_000397    | 307.1  | 163.6  | 1.39E-10 | 6.58E-07 | <i>CYBB</i>       | cytochrome b-245, beta polypeptide                                                      |
| NM_003217    | 293.4  | 154.5  | 2.08E-10 | 9.82E-07 | <i>TMBIM6</i>     | transmembrane BAX inhibitor motif containing 6                                          |
| NM_001781    | 225.4  | 367.6  | 3.20E-10 | 1.51E-06 | <i>CD69</i>       | CD69 molecule                                                                           |
| NM_000101    | 1236.6 | 921.5  | 3.57E-10 | 1.68E-06 | <i>CYBA</i>       | cytochrome b-245, alpha polypeptide                                                     |
| NM_000690    | 210.7  | 99.1   | 4.02E-10 | 1.89E-06 | <i>ALDH2</i>      | aldehyde dehydrogenase 2 family (mitochondrial)                                         |
| NM_002029    | 207.6  | 96.5   | 4.09E-10 | 1.93E-06 | <i>FPR1</i>       | formyl peptide receptor 1                                                               |
| NM_000616    | 343.1  | 193.5  | 4.54E-10 | 2.14E-06 | <i>CD4</i>        | CD4 molecule                                                                            |
| NM_025092    | 599.3  | 392.6  | 4.68E-10 | 2.21E-06 | <i>ATHL1</i>      | ATH1, acid trehalase-like 1 (yeast)                                                     |
| NM_012483    | 56.7   | 138.5  | 1.02E-09 | 4.82E-06 | <i>GNLY</i>       | granulysin                                                                              |
| NM_003516    | 28.6   | 93.2   | 1.09E-09 | 5.16E-06 | <i>HIST2H2AA3</i> | histone cluster 2, H2aa3                                                                |
| NM_002032    | 737.2  | 510.7  | 1.57E-09 | 7.40E-06 | <i>FTH1</i>       | ferritin, heavy polypeptide 1                                                           |
| NM_002332    | 146.3  | 58.7   | 1.68E-09 | 7.94E-06 | <i>LRP1</i>       | low density lipoprotein receptor-related protein 1                                      |
| NR_027856    | 46.9   | 120.8  | 1.89E-09 | 8.93E-06 | <i>CLK1</i>       | CDC-like kinase 1                                                                       |
| NM_001130689 | 44.1   | 115.4  | 3.14E-09 | 1.48E-05 | <i>HMGB2</i>      | high-mobility group box 2                                                               |
| NM_007074    | 1178.1 | 889.5  | 4.45E-09 | 2.10E-05 | <i>CORO1A</i>     | coronin, actin binding protein, 1A                                                      |
| NM_002619    | 157.2  | 67.5   | 4.50E-09 | 2.12E-05 | <i>PF4</i>        | platelet factor 4                                                                       |
| NM_002070    | 1060.7 | 791.4  | 6.03E-09 | 2.84E-05 | <i>GNAI2</i>      | guanine nucleotide binding protein (G protein), alpha inhibiting activity polypeptide 2 |
| NM_002308    | 136.9  | 56.1   | 7.41E-09 | 3.49E-05 | <i>LGALS9</i>     | lectin, galactoside-binding, soluble, 9                                                 |
| NM_003254    | 343.2  | 204.2  | 9.23E-09 | 4.35E-05 | <i>TIMP1</i>      | TIMP metalloproteinase inhibitor 1                                                      |
| NM_001004431 | 171.1  | 78.5   | 9.87E-09 | 4.65E-05 | <i>METRNL</i>     | meteorin, glial cell differentiation regulator-like                                     |
| NM_001336    | 856.2  | 621.9  | 1.27E-08 | 6.00E-05 | <i>CTSZ</i>       | cathepsin Z                                                                             |
| NM_017495    | 158.6  | 72.2   | 1.63E-08 | 7.66E-05 | <i>RBM38</i>      | RNA binding motif protein 38                                                            |
| NM_014059    | 82.1   | 166.0  | 1.63E-08 | 7.70E-05 | <i>C13ORF15</i>   | chromosome 13 open reading frame 15                                                     |
| NM_024329    | 617.4  | 425.3  | 1.79E-08 | 8.42E-05 | <i>EFHD2</i>      | EF-hand domain family, member D2                                                        |
| NM_001142276 | 364.3  | 222.6  | 2.02E-08 | 9.55E-05 | <i>APLP2</i>      | amyloid beta (A4) precursor-like protein 2                                              |
| NM_005252    | 628.7  | 818.3  | 2.47E-08 | 0.0001   | <i>FOS</i>        | FBJ murine osteosarcoma viral oncogene homolog                                          |
| NM_001558    | 144.0  | 62.6   | 2.60E-08 | 0.0001   | <i>IL10RA</i>     | interleukin 10 receptor, alpha                                                          |
| NM_021999    | 759.6  | 546.3  | 2.76E-08 | 0.0001   | <i>ITM2B</i>      | integral membrane protein 2B                                                            |
| NM_004048    | 8808.0 | 9291.2 | 3.40E-08 | 0.0002   | <i>B2M</i>        | beta-2-microglobulin                                                                    |
| NM_002124    | 1895.4 | 1540.7 | 7.13E-08 | 0.0003   | <i>HLA-DRB1</i>   | major histocompatibility complex, class II, DR beta 1                                   |
| NM_015714    | 780.0  | 978.0  | 7.22E-08 | 0.0003   | <i>G0S2</i>       | G0/G1switch 2                                                                           |
| NM_004313    | 350.0  | 216.8  | 7.34E-08 | 0.0003   | <i>ARRB2</i>      | arrestin, beta 2                                                                        |
| NM_001928    | 253.2  | 143.1  | 7.54E-08 | 0.0004   | <i>CFD</i>        | complement factor D (adipsin)                                                           |
| NM_005475    | 148.1  | 68.5   | 7.83E-08 | 0.0004   | <i>SH2B3</i>      | SH2B adaptor protein 3                                                                  |
| NM_054114    | 69.9   | 143.9  | 8.45E-08 | 0.0004   | <i>TAGAP</i>      | T-cell activation RhoGTPase activating protein                                          |
| NM_001136135 | 1135.4 | 875.8  | 1.14E-07 | 0.0005   | <i>RPL28</i>      | ribosomal protein L28                                                                   |

|              |        |        |          |        |                 |                                                                             |
|--------------|--------|--------|----------|--------|-----------------|-----------------------------------------------------------------------------|
| NM_017740    | 213.9  | 116.4  | 1.37E-07 | 0.0006 | <i>ZDHHC7</i>   | zinc finger, DHHC-type containing 7                                         |
| NM_018434    | 291.3  | 174.3  | 1.49E-07 | 0.0007 | <i>RNF130</i>   | ring finger protein 130                                                     |
| NM_001114620 | 114.2  | 47.3   | 1.60E-07 | 0.0008 | <i>MGAT1</i>    | mannosyl (alpha-1,3-)-glycoprotein beta-1,2-N-acetylglucosaminyltransferase |
| NM_006813    | 218.2  | 330.4  | 2.03E-07 | 0.0010 | <i>PNRC1</i>    | proline-rich nuclear receptor coactivator 1                                 |
| NR_027855    | 184.1  | 287.5  | 2.26E-07 | 0.0011 | <i>CLK1</i>     | CDC-like kinase 1                                                           |
| NM_052880    | 378.2  | 245.6  | 3.99E-07 | 0.0019 | <i>PIK3IP1</i>  | phosphoinositide-3-kinase interacting protein 1                             |
| NM_001145373 | 44.5   | 100.6  | 5.69E-07 | 0.0027 | <i>OTUD1</i>    | OTU domain containing 1                                                     |
| NM_015481    | 188.7  | 101.6  | 6.02E-07 | 0.0028 | <i>ZNF385A</i>  | zinc finger protein 385A                                                    |
| NR_024151    | 116.0  | 50.9   | 6.31E-07 | 0.0030 | <i>HSPA7</i>    | heat shock 70kDa protein 7 (HSP70B)                                         |
| NM_031950    | 46.7   | 104.8  | 6.52E-07 | 0.0031 | <i>FGFBP2</i>   | fibroblast growth factor binding protein 2                                  |
| NM_001169109 | 195.3  | 107.0  | 7.42E-07 | 0.0035 | <i>SCO2</i>     | SCO cytochrome oxidase deficient homolog 2 (yeast)                          |
| NM_001114619 | 148.6  | 73.9   | 7.70E-07 | 0.0036 | <i>MGAT1</i>    | mannosyl (alpha-1,3-)-glycoprotein beta-1,2-N-acetylglucosaminyltransferase |
| NM_001623    | 873.1  | 666.8  | 1.20E-06 | 0.0056 | <i>AIF1</i>     | allograft inflammatory factor 1                                             |
| NM_005729    | 98.4   | 171.5  | 1.40E-06 | 0.0066 | <i>PPIF</i>     | peptidylprolyl isomerase F                                                  |
| NM_004107    | 248.8  | 150.0  | 1.52E-06 | 0.0071 | <i>FCGRT</i>    | Fc fragment of IgG, receptor, transporter, alpha                            |
| NM_004635    | 155.4  | 79.7   | 1.53E-06 | 0.0072 | <i>MAPKAPK3</i> | mitogen-activated protein kinase-activated protein kinase 3                 |
| NM_177401    | 270.4  | 380.5  | 1.59E-06 | 0.0075 | <i>MIDN</i>     | midnolin                                                                    |
| NM_001024    | 820.7  | 995.8  | 1.66E-06 | 0.0078 | <i>RPS21</i>    | ribosomal protein S21                                                       |
| NM_184041    | 968.3  | 751.5  | 1.68E-06 | 0.0079 | <i>ALDOA</i>    | aldolase A, fructose-bisphosphate                                           |
| NM_012401    | 227.3  | 133.5  | 1.93E-06 | 0.0091 | <i>PLXNB2</i>   | plexin B2                                                                   |
| NR_003038    | 191.2  | 285.5  | 2.06E-06 | 0.0097 | <i>SNHG5</i>    | small nucleolar RNA host gene 5 (non-protein coding)                        |
| NM_001098526 | 294.6  | 186.9  | 2.06E-06 | 0.0097 | <i>AMICA1</i>   | adhesion molecule, interacts with CXADR antigen 1                           |
| NM_001077488 | 640.9  | 797.3  | 2.18E-06 | 0.0103 | <i>GNAS</i>     | GNAS complex locus                                                          |
| NM_001124    | 39.5   | 90.6   | 2.42E-06 | 0.0114 | <i>ADM</i>      | adrenomedullin                                                              |
| NM_005194    | 500.0  | 639.5  | 2.45E-06 | 0.0116 | <i>CEBPB</i>    | CCAAT/enhancer binding protein (C/EBP), beta                                |
| NM_000570    | 191.2  | 108.3  | 2.75E-06 | 0.0129 | <i>FCGR3B</i>   | Fc fragment of IgG, low affinity IIIb, receptor (CD16b)                     |
| NM_016270    | 484.0  | 620.9  | 2.86E-06 | 0.0135 | <i>KLF2</i>     | Kruppel-like factor 2 (lung)                                                |
| NM_002654    | 279.9  | 177.1  | 3.23E-06 | 0.0152 | <i>PKM2</i>     | pyruvate kinase, muscle                                                     |
| NR_001298    | 218.0  | 128.8  | 3.32E-06 | 0.0157 | <i>HLA-DRB6</i> | major histocompatibility complex, class II, DR beta 6 (pseudogene)          |
| NM_014435    | 112.3  | 52.1   | 3.56E-06 | 0.0168 | <i>NAAA</i>     | N-acylethanolamine acid amidase                                             |
| NM_017801    | 135.0  | 67.8   | 3.62E-06 | 0.0171 | <i>CMTM6</i>    | CKLF-like MARVEL transmembrane domain containing 6                          |
| NM_001136136 | 1264.1 | 1018.6 | 3.64E-06 | 0.0171 | <i>RPL28</i>    | ribosomal protein L28                                                       |
| NM_020801    | 72.1   | 133.7  | 3.93E-06 | 0.0185 | <i>ARRDC3</i>   | arrestin domain containing 3                                                |
| NM_002727    | 1318.1 | 1069.0 | 4.49E-06 | 0.0212 | <i>SRGN</i>     | serglycin                                                                   |
| NM_018837    | 166.5  | 91.2   | 4.55E-06 | 0.0214 | <i>SULF2</i>    | sulfatase 2                                                                 |

|              |        |        |           |        |                   |                                                                                                                          |
|--------------|--------|--------|-----------|--------|-------------------|--------------------------------------------------------------------------------------------------------------------------|
| NM_033554    | 1093.6 | 870.8  | 4.66E-06  | 0.0220 | <i>HLA-DPA1</i>   | major histocompatibility complex, class II, DP alpha 1                                                                   |
| NM_032048    | 141.1  | 72.9   | 4.80E-06  | 0.0227 | <i>EMILIN2</i>    | elastin microfibril interfacier 2                                                                                        |
| NM_025250    | 99.2   | 44.2   | 5.08E-06  | 0.0239 | <i>TTYH3</i>      | tweety homolog 3 (Drosophila)                                                                                            |
| NM_003467    | 884.0  | 688.4  | 5.30E-06  | 0.0250 | <i>CXCR4</i>      | chemokine (C-X-C motif) receptor 4                                                                                       |
| NM_152866    | 92.3   | 159.3  | 5.47E-06  | 0.0258 | <i>MS4A1</i>      | membrane-spanning 4-domains, subfamily A, member 1                                                                       |
| NR_027168    | 191.4  | 280.7  | 5.54E-06  | 0.0261 | <i>NCRNA00188</i> | non-protein coding RNA 188                                                                                               |
| NM_201413    | 103.1  | 47.1   | 5.90E-06  | 0.0278 | <i>APP</i>        | amyloid beta (A4) precursor protein                                                                                      |
| NR_027353    | 89.5   | 154.0  | 7.33E-06  | 0.0346 | <i>CD8A</i>       | CD8a molecule                                                                                                            |
| NR_024110    | 61.5   | 118.5  | 8.28E-06  | 0.0391 | <i>SBDSP1</i>     | Homo sapiens Shwachman-Bodian-Diamond syndrome pseudogene 1                                                              |
| NM_001039465 | 48.8   | 100.1  | 8.78E-06  | 0.0414 | <i>SRSF5</i>      | serine/arginine-rich splicing factor 5                                                                                   |
| NM_145912    | 118.8  | 59.1   | 9.01E-06  | 0.0425 | <i>NFAM1</i>      | NFAT activating protein with ITAM motif 1                                                                                |
| NM_002568    | 1692.0 | 1412.1 | 9.28E-06  | 0.0437 | <i>PABPC1</i>     | poly(A) binding protein, cytoplasmic 1                                                                                   |
| NM_004390    | 195.3  | 115.2  | 9.35E-06  | 0.0441 | <i>CTSH</i>       | cathepsin H                                                                                                              |
| NM_145058    | 187.1  | 108.8  | 9.57E-06  | 0.0451 | <i>RILPL2</i>     | Rab interacting lysosomal protein-like 2                                                                                 |
| NM_003190    | 213.3  | 128.7  | 9.90E-06  | 0.0467 | <i>TAPBP</i>      | TAP binding protein (tapasin)                                                                                            |
| NM_212481    | 268.8  | 173.3  | 1.02E-05  | 0.0482 | <i>ARID5A</i>     | AT rich interactive domain 5A (MRF1-like)                                                                                |
| NM_003641    | 493.1  | 620.5  | 1.07E-05  | 0.0502 | <i>IFITM1</i>     | interferon induced transmembrane protein 1 (9-27)                                                                        |
| NM_178841    | 123.8  | 62.6   | 1.09E-05  | 0.0513 | <i>RNF166</i>     | ring finger protein 166                                                                                                  |
| NM_013262    | 59.8   | 114.2  | 1.21E-05  | 0.0573 | <i>MYLIP</i>      | myosin regulatory light chain interacting protein                                                                        |
| NM_001111097 | 208.2  | 126.3  | 1.256E-05 | 0.0592 | <i>LYN</i>        | v-yes-1 Yamaguchi sarcoma viral related oncogene homolog                                                                 |
| NM_000732    | 232.8  | 326.2  | 1.27E-05  | 0.0597 | <i>CD3D</i>       | CD3d molecule, delta (CD3-TCR complex)                                                                                   |
| NM_002076    | 96.3   | 43.9   | 1.31E-05  | 0.0620 | <i>GNS</i>        | glucosamine (N-acetyl)-6-sulfatase                                                                                       |
| NM_001031696 | 108.9  | 52.5   | 1.36E-05  | 0.0640 | <i>PLD3</i>       | phospholipase D family, member 3                                                                                         |
| NM_000889    | 99.2   | 164.2  | 1.47E-05  | 0.0691 | <i>ITGB7</i>      | integrin, beta 7                                                                                                         |
| NM_182763    | 133.4  | 206.2  | 1.54E-05  | 0.0727 | <i>MCL1</i>       | myeloid cell leukemia sequence 1 (BCL2-related)                                                                          |
| NM_002957    | 94.0   | 42.7   | 1.55E-05  | 0.0730 | <i>RXRA</i>       | retinoid X receptor, alpha                                                                                               |
| NM_030912    | 131.0  | 68.8   | 1.58E-05  | 0.0746 | <i>TRIM8</i>      | tripartite motif-containing 8                                                                                            |
| NM_001134486 | 33.2   | 75.1   | 1.83E-05  | 0.0863 | <i>GBP5</i>       | guanylate binding protein 5                                                                                              |
| NM_181672    | 236.0  | 326.7  | 1.94E-05  | 0.0916 | <i>OGT</i>        | O-linked N-acetylglucosamine (GlcNAc) transferase (UDP-N-acetylglucosamine:polypeptide-N-acetylglucosaminyl transferase) |
| NM_003380    | 1662.0 | 1394.2 | 1.99E-05  | 0.0938 | <i>VIM</i>        | vimentin                                                                                                                 |
| NR_029467    | 259.5  | 168.2  | 2.07E-05  | 0.0974 | <i>SELL</i>       | selectin L                                                                                                               |

<sup>a</sup>P-value was calculated by Fisher's exact test.



**Table S2 - Genes exclusively expressed in cases or controls**

| <b>ID</b>    | <b>Control 1</b> | <b>Control 2</b> | <b>Control 2</b> | <b>Case 1</b> | <b>Case 2</b> | <b>Case 3</b> | <b>Gene</b>       | <b>Description</b>                                                              |
|--------------|------------------|------------------|------------------|---------------|---------------|---------------|-------------------|---------------------------------------------------------------------------------|
| NM_001077494 | 0.0000           | 0.0000           | 0.0000           | 11.6300       | 7.7593        | 10.4268       | <i>NFKB2</i>      | nuclear factor of kappa light polypeptide gene enhancer in B-cells 2 (p49/p100) |
| NM_001127213 | 0.0000           | 0.0000           | 0.0000           | 106.5230      | 46.4870       | 40.8874       | <i>LY6E</i>       | lymphocyte antigen 6 complex, locus E                                           |
| NM_001128208 | 0.0000           | 0.0000           | 0.0000           | 6.0587        | 2.5580        | 5.8632        | <i>LEPROTL1</i>   | leptin receptor overlapping transcript-like 1                                   |
| NM_001144876 | 0.0000           | 0.0000           | 0.0000           | 2.0537        | 2.8688        | 9.1984        | <i>DOK3</i>       | docking protein 3                                                               |
| NM_001146068 | 0.0000           | 0.0000           | 0.0000           | 12.3968       | 22.5249       | 3.4852        | <i>CAPN2</i>      | calpain 2, (m/II) large subunit                                                 |
| NM_001921    | 0.0000           | 0.0000           | 0.0000           | 11.7537       | 6.8281        | 7.4528        | <i>DCTD</i>       | dCMP deaminase                                                                  |
| NM_006117    | 0.0000           | 0.0000           | 0.0000           | 4.0215        | 4.7377        | 7.7940        | <i>PECI</i>       | peroxisomal D3,D2-enoyl-CoA isomerase                                           |
| NM_138473    | 0.0000           | 0.0000           | 0.0000           | 5.5412        | 9.4535        | 7.2871        | <i>SPI</i>        | Sp1 transcription factor                                                        |
| NM_182835    | 0.0000           | 0.0000           | 0.0000           | 5.0806        | 2.3511        | 4.5758        | <i>SCFD1</i>      | sec1 family domain containing 1                                                 |
| NM_194450    | 0.0000           | 0.0000           | 0.0000           | 11.6918       | 8.0243        | 2.5439        | <i>CLEC4A</i>     | C-type lectin domain family 4, member A                                         |
| NM_198218    | 0.0000           | 0.0000           | 0.0000           | 4.6926        | 2.6236        | 2.1580        | <i>ING1</i>       | inhibitor of growth family, member 1                                            |
| NM_207002    | 0.0000           | 0.0000           | 0.0000           | 5.6596        | 2.5886        | 4.3098        | <i>BCL2L11</i>    | BCL2-like 11 (apoptosis facilitator)                                            |
| NM_001001390 | 11.6376          | 5.4548           | 10.8171          | 0.0000        | 0.0000        | 0.0000        | <i>CD44</i>       | CD44 molecule (Indian blood group)                                              |
| NM_001145134 | 3.3259           | 6.4170           | 3.3070           | 0.0000        | 0.0000        | 0.0000        | <i>CPT1B</i>      | carnitine palmitoyltransferase 1B (muscle)                                      |
| NM_001146110 | 3.2340           | 3.7043           | 3.9840           | 0.0000        | 0.0000        | 0.0000        | <i>MIER1</i>      | mesoderm induction early response 1 homolog ( <i>Xenopus laevis</i> )           |
| NM_005133    | 10.2785          | 5.2491           | 8.6697           | 0.0000        | 0.0000        | 0.0000        | <i>RCE1</i>       | RCE1 homolog, prenyl protein peptidase ( <i>S. cerevisiae</i> )                 |
| NM_152236    | 7.9148           | 6.8971           | 5.1274           | 0.0000        | 0.0000        | 0.0000        | <i>GAS2L1</i>     | growth arrest-specific 2 like 1                                                 |
| NR_024040    | 2.2370           | 4.1330           | 4.8507           | 0.0000        | 0.0000        | 0.0000        | <i>CSGALNACT1</i> | chondroitin sulfate N-acetylgalactosaminyltransferase 1                         |
| NR_027299    | 2.2421           | 11.6814          | 2.9371           | 0.0000        | 0.0000        | 0.0000        | <i>XPC</i>        | xeroderma pigmentosum, complementation group C                                  |
| NR_027834    | 8.3139           | 8.9451           | 5.4076           | 0.0000        | 0.0000        | 0.0000        | <i>APOL3</i>      | apolipoprotein L, 3                                                             |

**Table S3 - CAMs genes located in the MHC regions (chr6:20,000,000-40,000,000)**

| <b>Gene</b>     | <b>Start position</b> | <b>End position</b> |
|-----------------|-----------------------|---------------------|
| <i>HLA-F</i>    | 29799096              | 29803052            |
| <i>HLA-G</i>    | 29903497              | 29906859            |
| <i>HLA-A</i>    | 30018310              | 30021633            |
| <i>HLA-E</i>    | 30565250              | 30569077            |
| <i>HLA-C</i>    | 31344508              | 31347834            |
| <i>HLA-B</i>    | 31429628              | 31432914            |
| <i>HLA-DRA</i>  | 32515625              | 32520801            |
| <i>HLA-DRB5</i> | 32593129              | 32605984            |
| <i>HLA-DRB1</i> | 32654527              | 32665559            |
| <i>HLA-DQA1</i> | 32713161              | 32719407            |
| <i>HLA-DQB1</i> | 32735635              | 32742444            |
| <i>HLA-DQA2</i> | 32817141              | 32823199            |
| <i>HLA-DOB</i>  | 32888518              | 32892803            |
| <i>HLA-DMB</i>  | 33010393              | 33016795            |
| <i>HLA-DMA</i>  | 33024373              | 33028831            |
| <i>HLA-DOA</i>  | 33079937              | 33085367            |
| <i>HLA-DPA1</i> | 33140772              | 33149356            |
| <i>HLA-DPB1</i> | 33151738              | 33162954            |
